# Supplementary material
Source: Royal Society of Chemistry journal article supplement (doi:10.1039/d6ta01586g)
Supplement: d6ta01586g1.pdf [file d6ta01586g1.pdf]

1 Supporting Information

2

3 **TiO<sub>2</sub>/Cu<sub>2</sub>O Heterojunction Embedded PDMS Composite with**  
4 **Superhydrophobic Surface for Efficient Raindrop Energy Harvesting**

5

6 Zhihao Zhang<sup>a, b\*</sup>, Liangjun Lv<sup>a\*</sup>, Jiao Wang<sup>b\*</sup>, Yang Liu<sup>b\*</sup>

7

8 a. Basic Department, Yellow River Conservancy Technical University, Kaifeng,  
9 475004, China

10 b. Key Lab for Special Functional Materials of Ministry of Education, National & Local  
11 Joint Engineering Research Center for High-efficiency Display and Lighting  
12 Technology, Collaborative Innovation Center of Nano Functional Materials and  
13 Applications, School of Nanoscience and Materials Engineering, Henan University,  
14 Kaifeng, 475004, China

15

16 E-mail: [kfzzh@163.com](mailto:kfzzh@163.com), [llj19900628@163.com](mailto:llj19900628@163.com), [13203449093@163.com](mailto:13203449093@163.com),

17 [744069064@qq.com](mailto:744069064@qq.com)

18

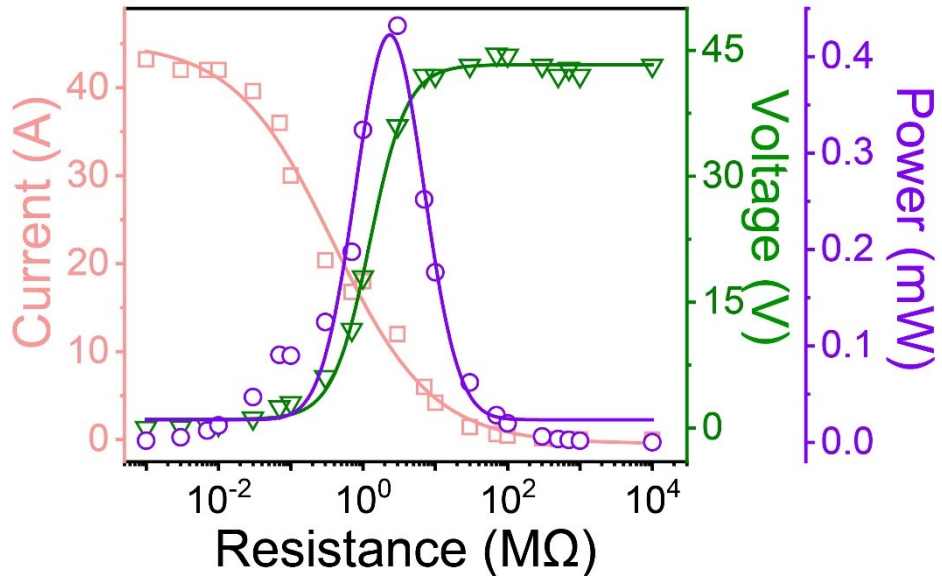

19

20 **Figure S1.** Dependences of voltage, current, and power on load resistance for traditional D-TENG.

21

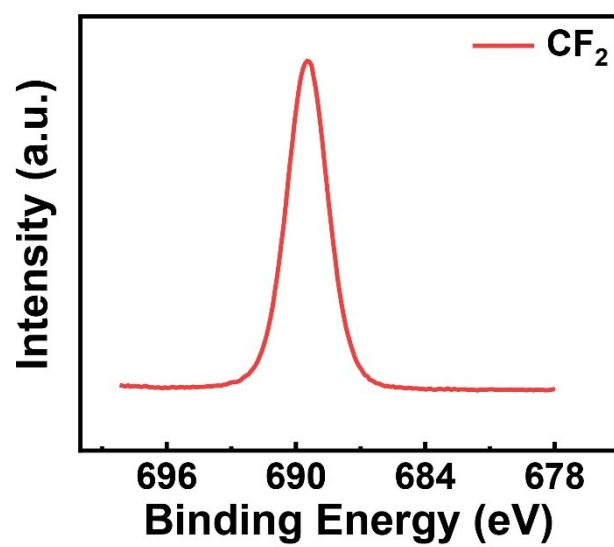

22

23 **Figure S2.** The F 1s spectrum of the F-silica-coated PDMS.

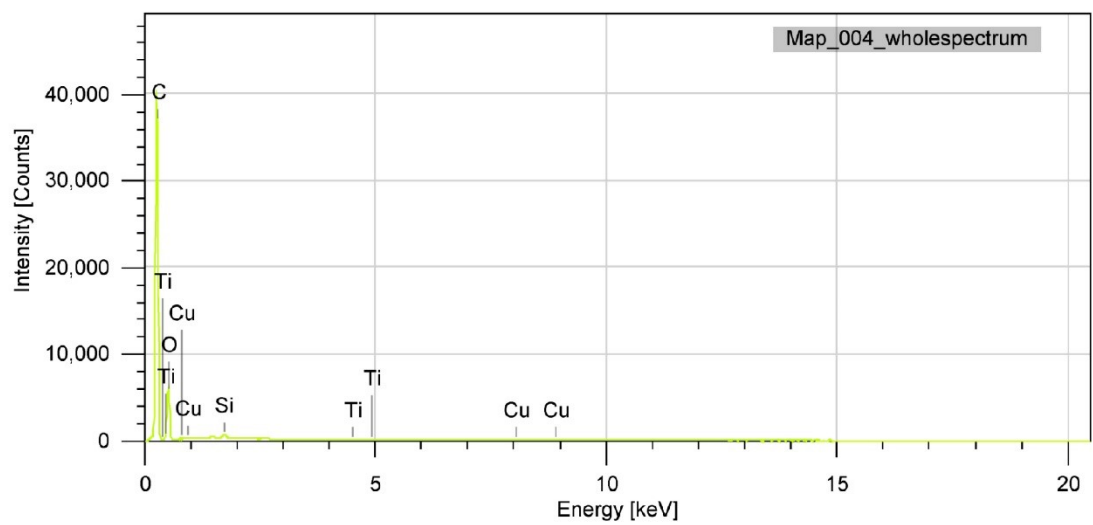

25

26 **Figure S3.** EDS spectra of the HC-PDMS.

27

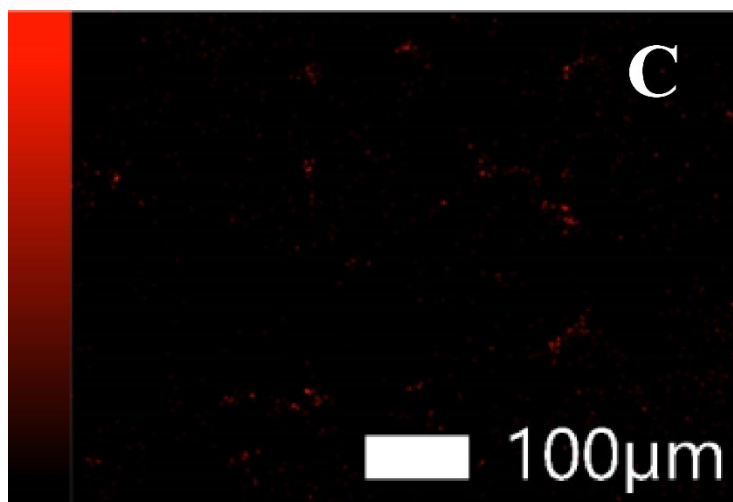

28

29 **Figure S4.** Elemental distribution images of the F-silica-coated HC-PDMS.

30

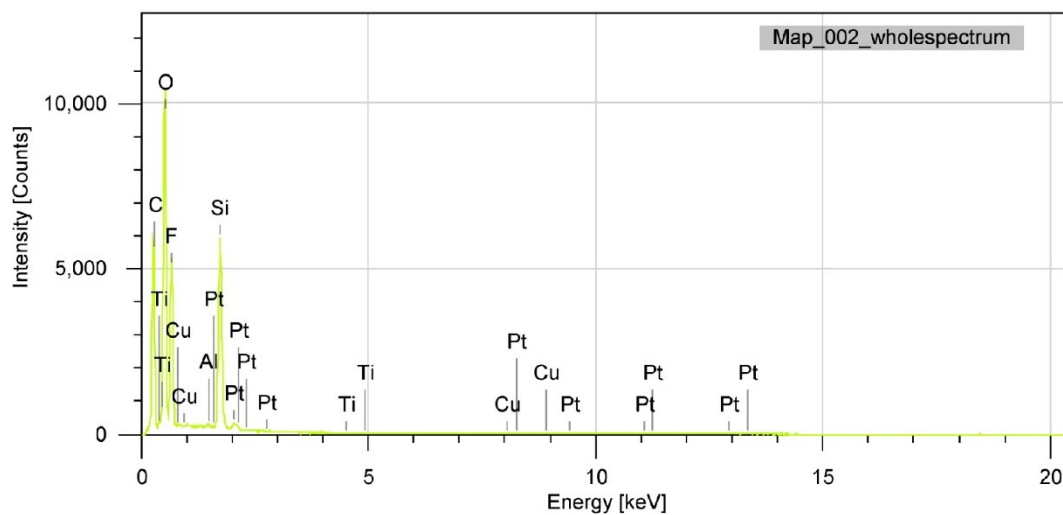

31

32 **Figure S5.** EDS spectra of the F-silica-coated HC-PDMS.

33

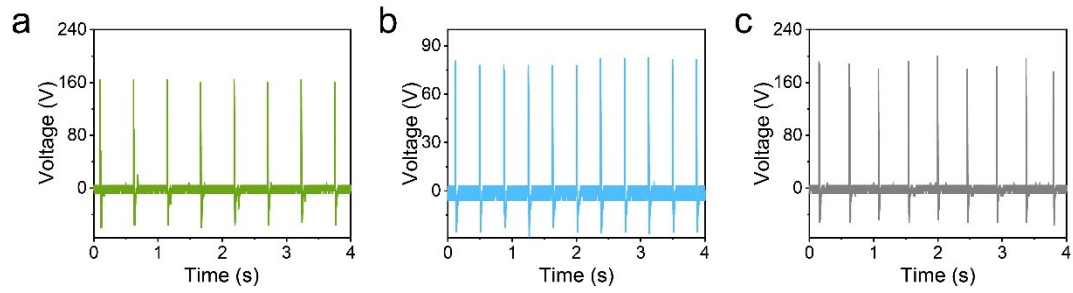

34

35 **Figure S6.** The output voltage of D-TENGs based on a)  $\text{TiO}_2$ -PDMS, b)  $\text{Cu}_2\text{O}$ -PDMS, and c) PDMS

36 coated solely with F-silica.

37

38

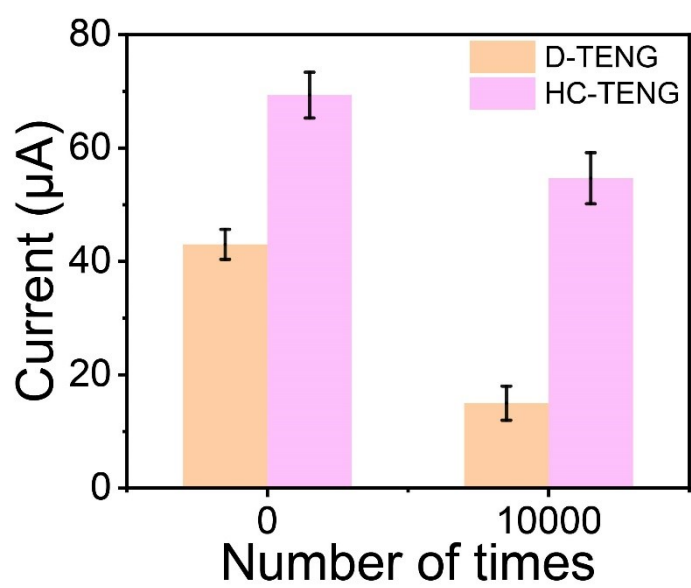

39

40 **Figure S7.** Transferred charge of the traditional D-TENG and the HC-TENG before and after

41 10,000 droplet impacts.

42

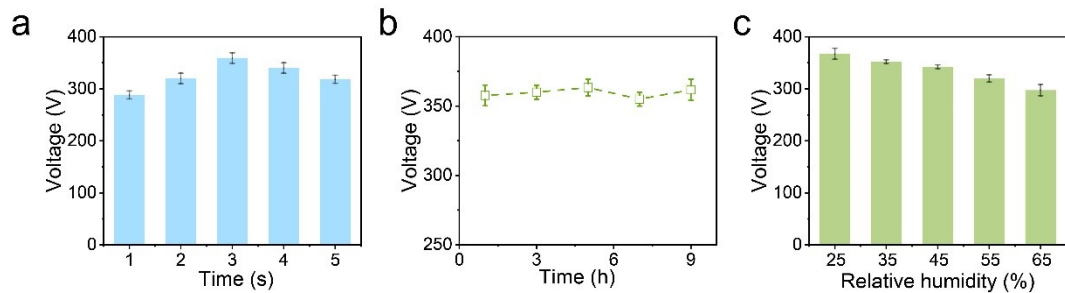

43

44 **Figure S8.** The output voltage of the HC-TENG at different a) thicknesses, b) UV exposure

45 durations, and c) relative humidity levels.

46

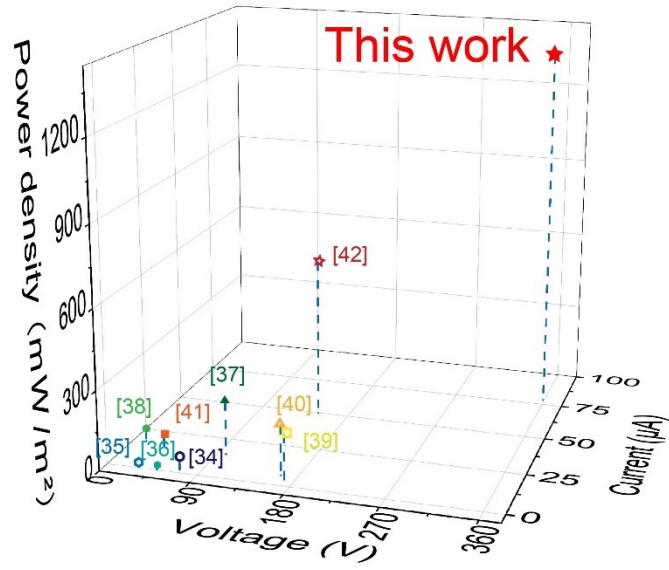

47

48 **Figure S9.** Comparison of output current, voltage, and power between the HC-TENG  
 49 and previously reported works.

50
